# Supplementary material for: ESBL-plasmid carriage in E. coli enhances in vitro bacterial competition fitness and serum resistance in some strains of pandemic sequence types without overall fitness cost
Source: Springer Nature journal article supplement (doi:10.1186/s13099-018-0243-z), 2018-06-15
Supplement: MOESM1 [file 15849022]

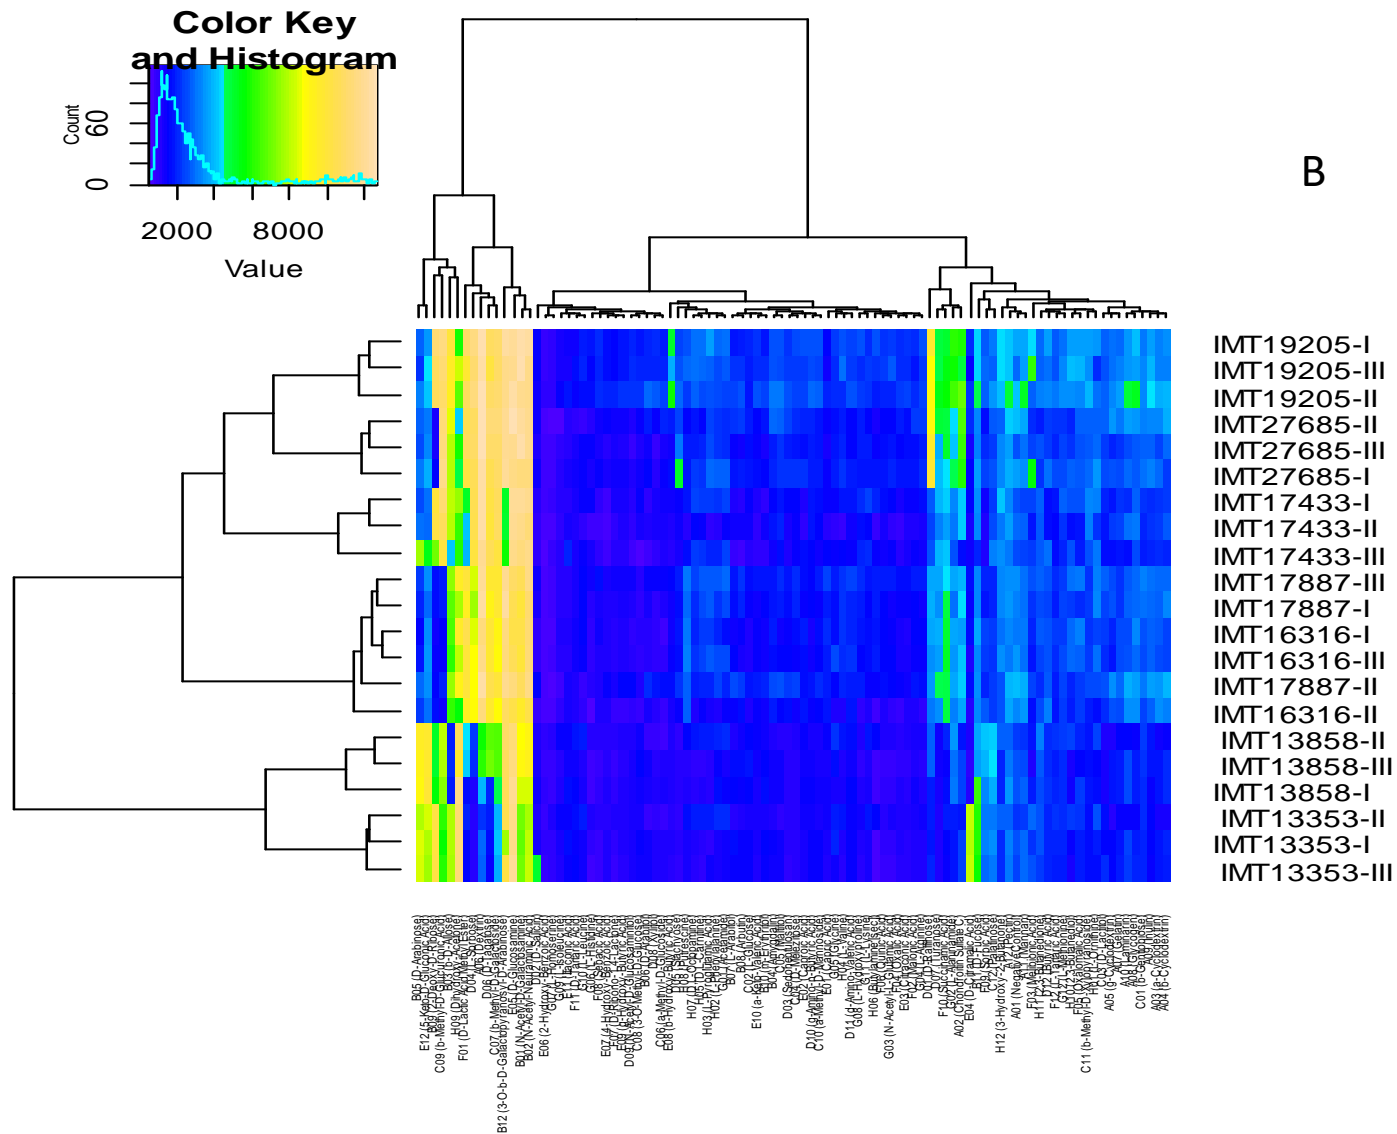

Heat maps generated using R-program for PM2 (carbon sources) for all seven strains including five ESBL strains and two competitors. Horizontal panel displays the names of metabolite and vertical panel depicts the strains. The color represent the extent of utilization as denoted by color key on top.

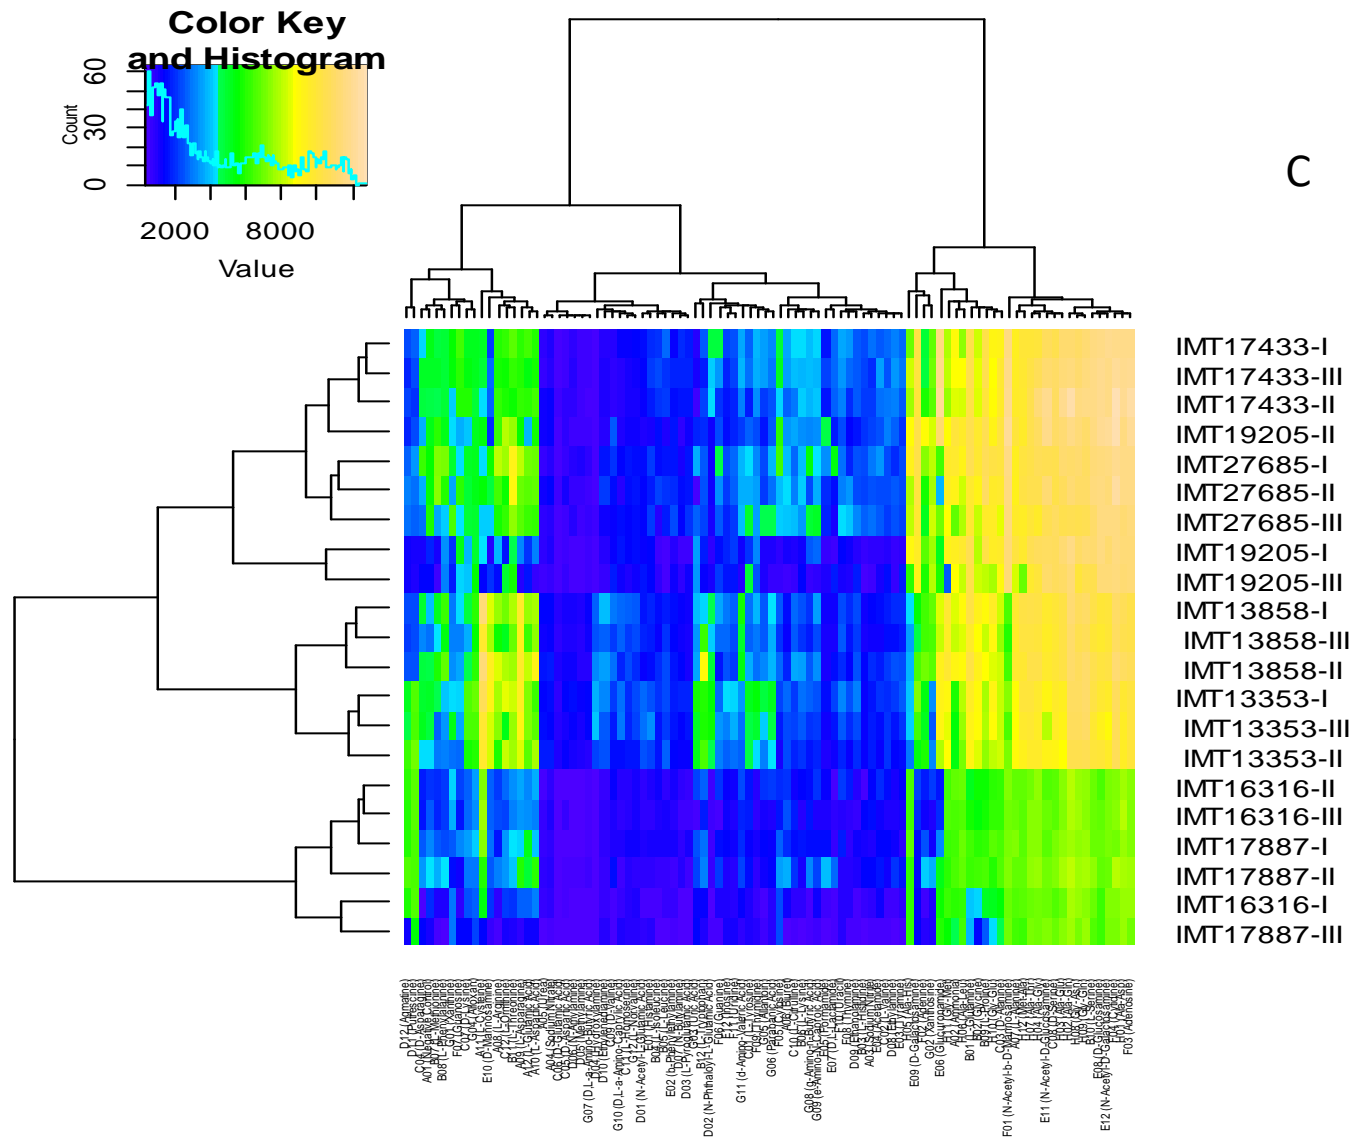

Heat maps generated using R-program for PM3 (Nitrogen sources) for all seven strains including five ESBP strains and two competitors. Horizontal panel displays the names of metabolite and vertical panel depicts the strains. The color represent the extent of utilization as denoted by color key on top.



Figure S2

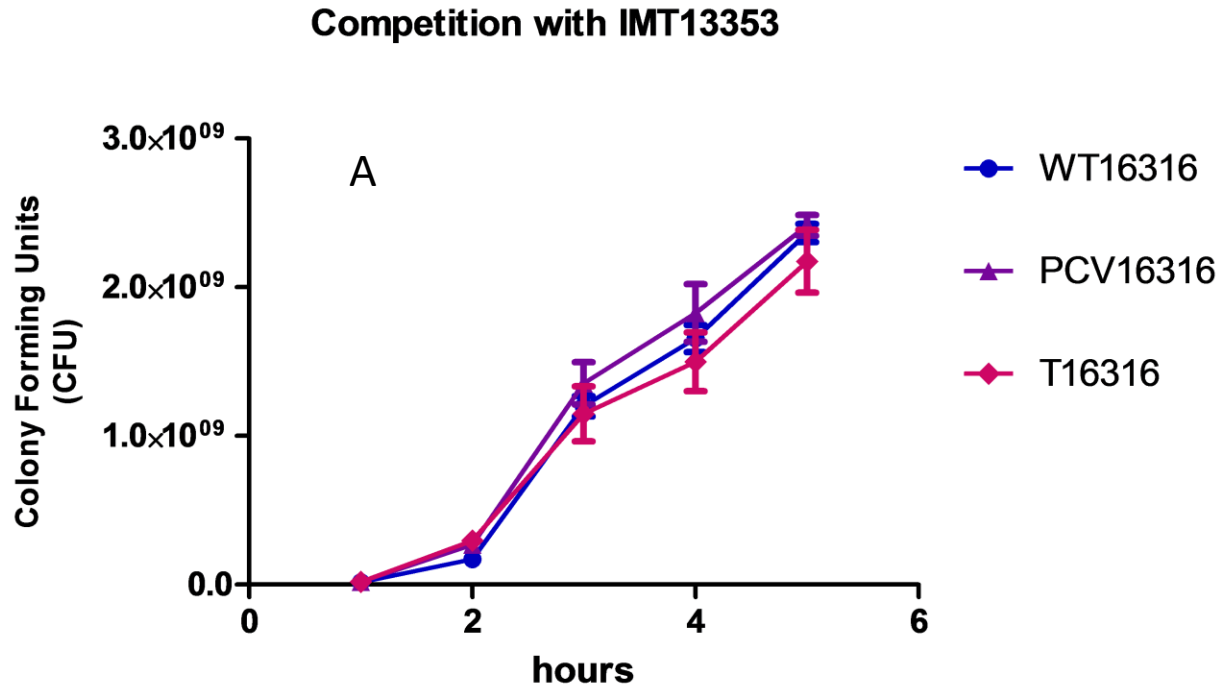

Competition assay between variants of IMT16316 and IMT13353 for five hours. Growth is measured in terms of colony forming units

### Competition with IMT13858

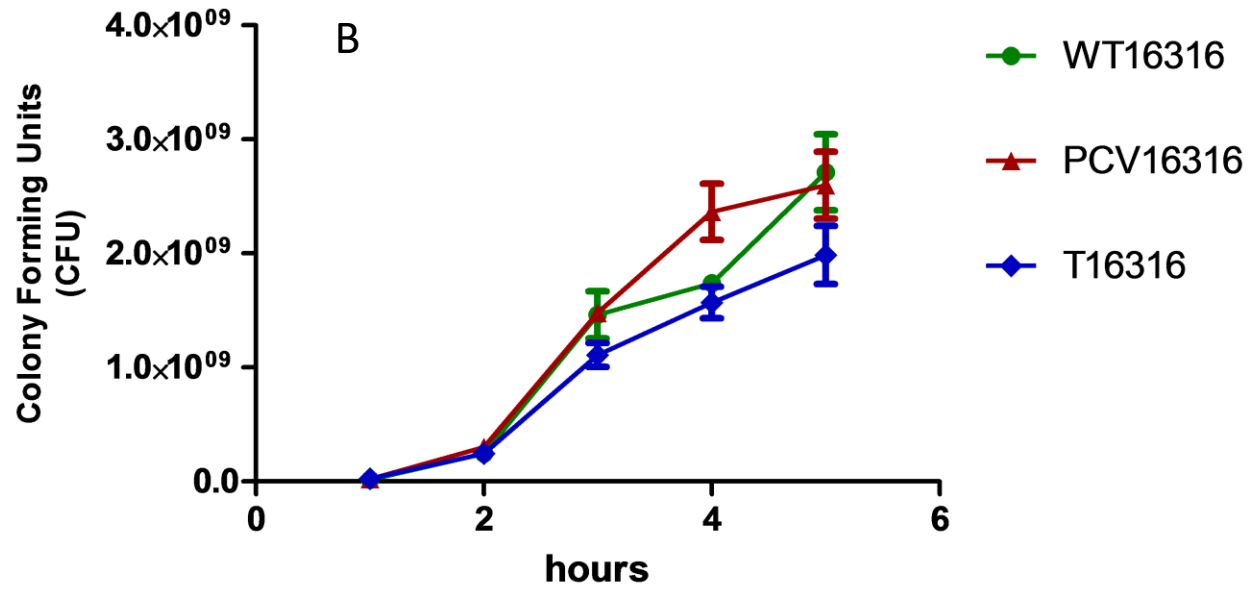

Competition assay between variants of IMT16316 and IMT13858 for five hours. Growth is measured in terms of colony forming units

### Competition with IMT13353

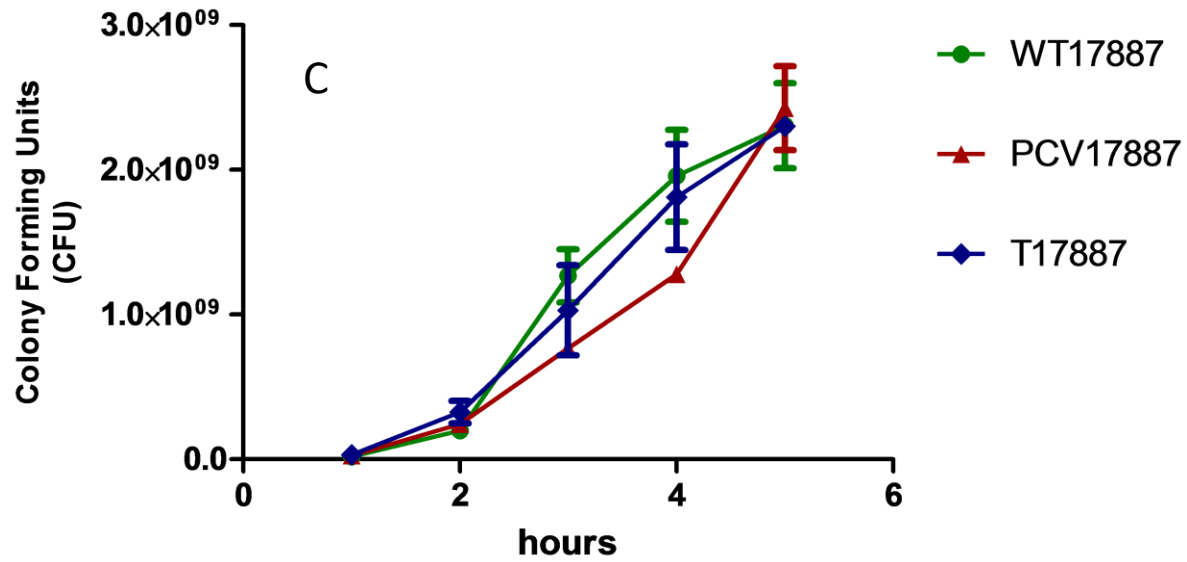

Competition assay between variants of IMT17887 and IMT13353 for five hours. Growth is measured in terms of colony forming units

### Competition with IMT13858

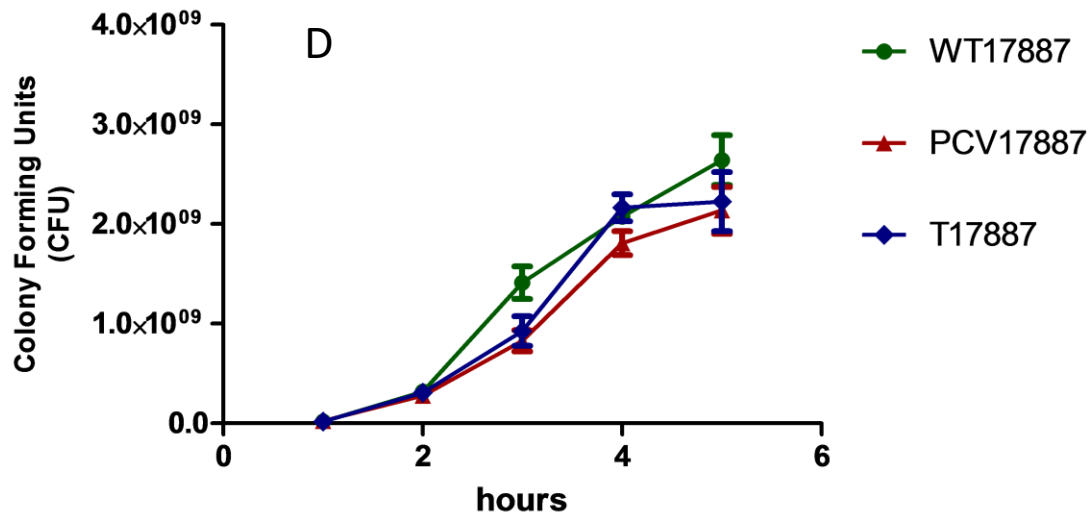

Competition assay between variants of IMT17887 and IMT13858 for five hours. Growth is measured in terms of colony forming units



### Competition with IMT13353

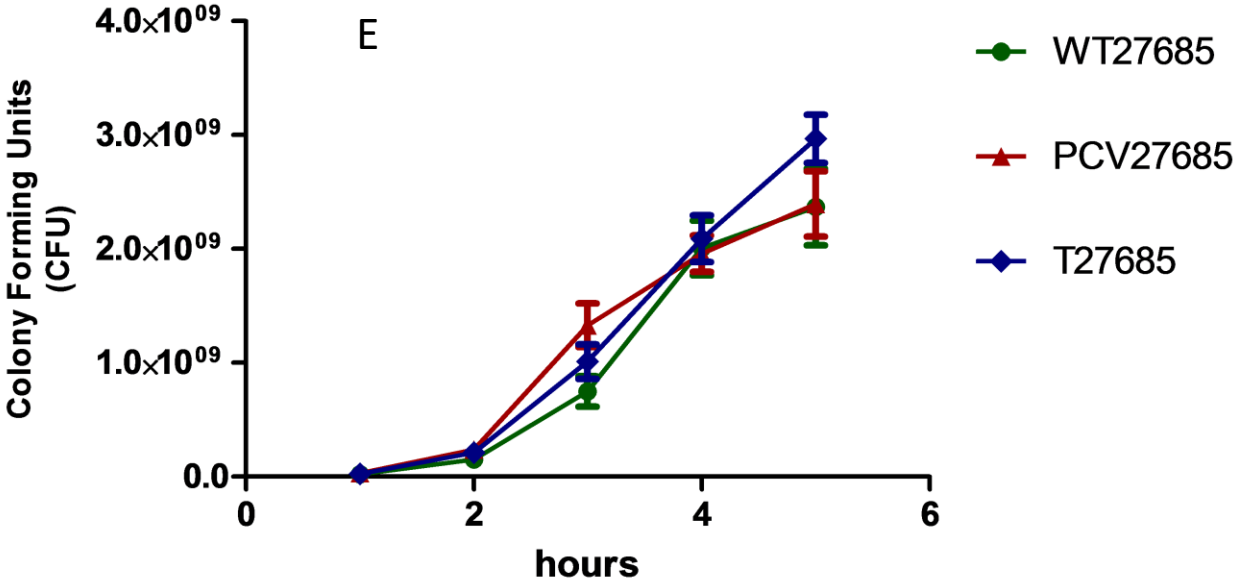

Competition assay between variants of IMT27685 and IMT13353 for five hours. Growth is measured in terms of colony forming units

### Competition with IMT13858

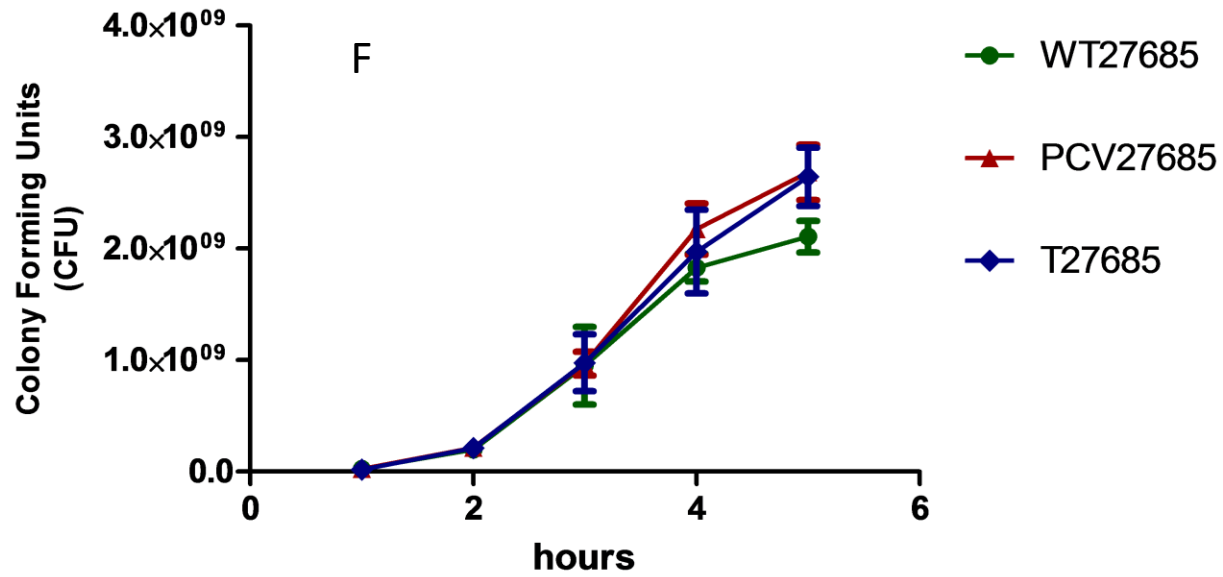

Competition assay between variants of IMT27685 and IMT13858 for five hours. Growth is measured in terms of colony forming units

Figure S3

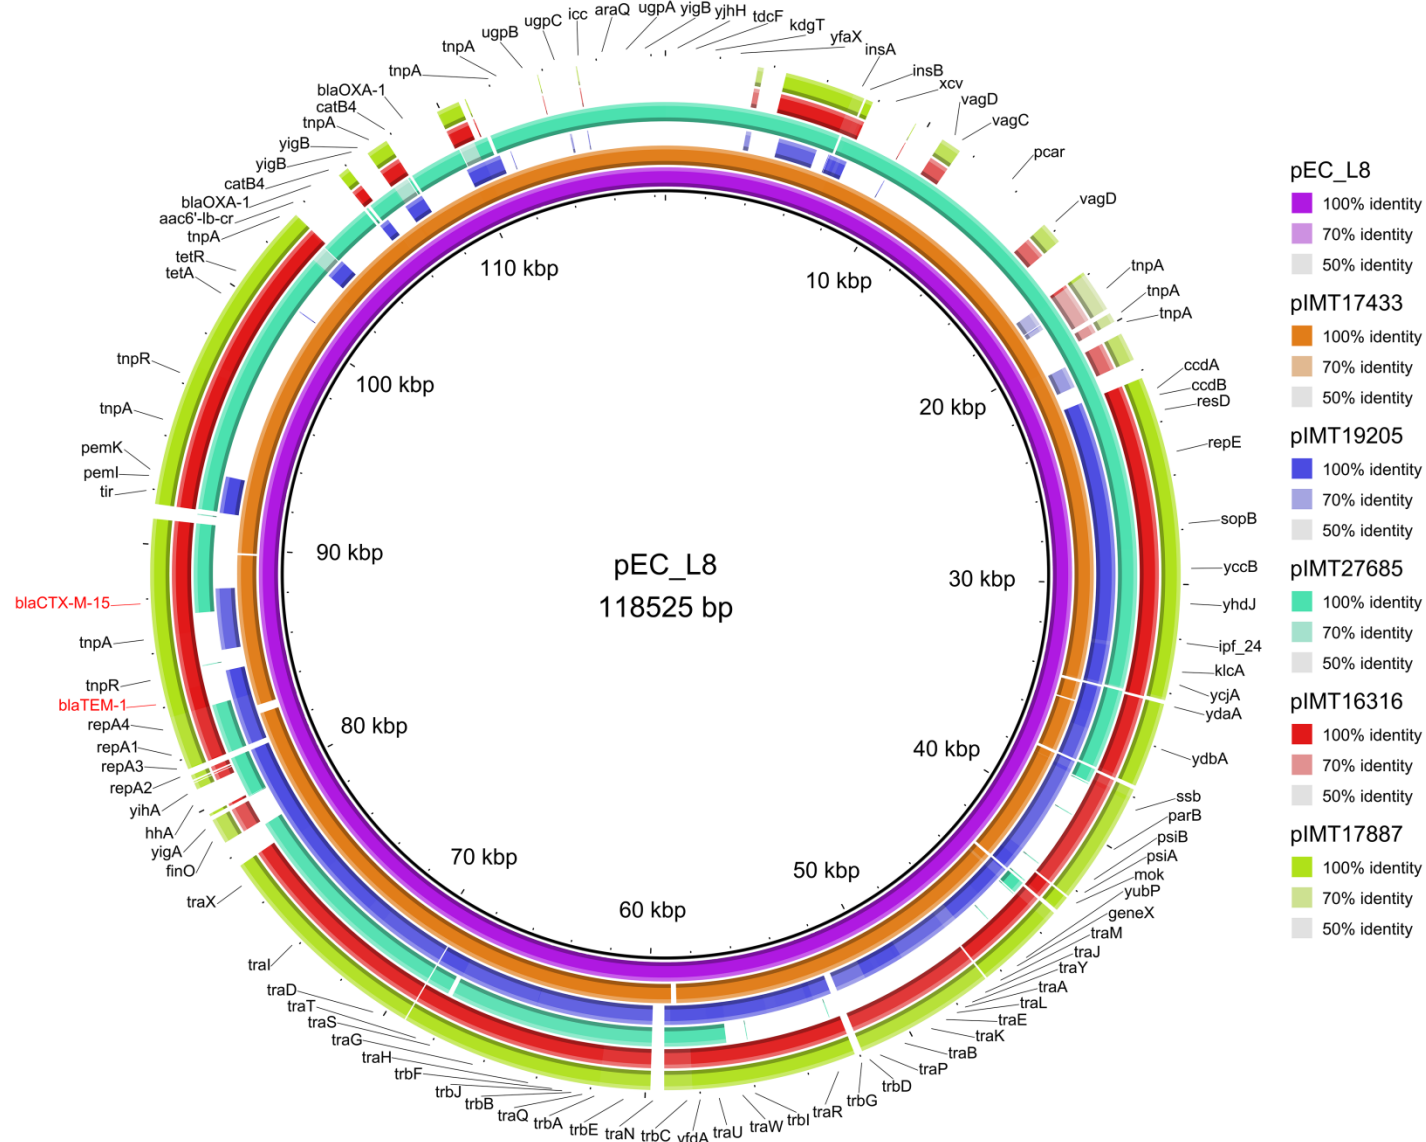

BRIG image of the ESBL-plasmids of the strains in the study, pEC\_L8 served as reference for the comparison while other representative concentric rings represent the ESBL-plasmids as pIMT17433, pIMT19205, pIMT27685, pIMT 16316 and pIMT17887 respectively.

Table S1: Details of the strains used in this study and their characteristics

| Strain   | Host                               | Origin                      | ESBL type | ESBL-plasmid REL/RIP proteins and Inc group | ESBL-plasmid size (bp) | Number of additional plasmids (sizes in bp) | Sequence types |
|----------|------------------------------------|-----------------------------|-----------|---------------------------------------------|------------------------|---------------------------------------------|----------------|
| IMT17433 | Dog ( <i>C. lupus familiaris</i> ) | Urinary tract infection     | CTX-M-15  | MOB <sub>F12</sub> , RepFIA/FII, IncF       | 122,823                | 1 (1600)                                    | 131            |
| IMT19205 | Brown rat ( <i>R. norvegicus</i> ) | Feces                       | CTX-M-27  | MOB <sub>F12</sub> , RepFIA/FIB/FII, IncF   | 166,151                | 2 (1500, 5200)                              | 131            |
| IMT27685 | Raven ( <i>C. corax</i> )          | Feces                       | CTX-M-15  | MOB <sub>F12</sub> , RepFIA/FII, IncF       | 133,611                | 1 (1600)                                    | 131            |
| IMT16316 | Blackbird ( <i>T. merula</i> )     | Feces                       | CTX-M-15  | MOB <sub>F12</sub> , RepFIA/FIB, IncF       | 136,508                | 4 (2500, 3200, 4100, 7000)                  | 648            |
| IMT17887 | Horse ( <i>E. ferus caballus</i> ) | Soft tissue/wound infection | CTX-M-15  | MOB <sub>F12</sub> , RepFIA/FIB, IncF       | 143,494                | 2 (2600, 7100)                              | 648            |
